# Supplementary material for: From Experimental Procedure to Clinical Practice: How Much Evidence Do We Need in Uterine Transplantation?
Source: Preprints.org preprint supplement (doi:10.20944/preprints201806.0420.v1), 2018-06-26
Supplement: Supplementary file 1 [file supplementary]

Table 1: UTx Studies Registered on Clinicaltrials.gov

| ClinicalTrials.gov Identifier: | Name                                                                                              | Status             | Principal investigator | Phase   | Sponsor                        | estimated enrollment | Donor                             | Start date    | Completion date |
|--------------------------------|---------------------------------------------------------------------------------------------------|--------------------|------------------------|---------|--------------------------------|----------------------|-----------------------------------|---------------|-----------------|
| NCT03307356                    | Penn Uterine Transplantation for Uterine Factor Infertility Trial (UNTIL)                         | Active, recruiting | Dr Kathleen E O'Neill  |         |                                | 5                    | Deceased                          | November 2017 | July 2020       |
| NCT02388802                    | Human Clinical Trial of Uterine Transplantation in the United Kingdom                             | Not yet recruiting | Dr Richard Smith       |         | Womb Transplant UK;            | 10                   | Deceased                          | January 2017  | January 2020    |
| NCT02573415                    | Uterine Transplantation for the Treatment of Uterine Factor Infertility                           | Active, recruiting | Dr Andreas Tzakis      | Phase 1 | The Cleveland Clinic (US)      | 10                   | Deceased                          | October 2015  | October 2020    |
| NCT02656550                    | Uterine Transplantation and Pregnancy Induction in Women Affected by Absolute Uterine Infertility | Active, recruiting | Dr Giuliano Testa      |         | Baylor Research Institute (US) | 10                   | Either living and deceased donors | February 2016 | January 2021    |

|             |                                                                                                             |                                |                       |                                          |                                         |                                |          |                |               |
|-------------|-------------------------------------------------------------------------------------------------------------|--------------------------------|-----------------------|------------------------------------------|-----------------------------------------|--------------------------------|----------|----------------|---------------|
| NCT02409147 | Initiation of a Deceased Donor Uterine Transplantation Program at the University of Nebraska Medical Center | Not yet recruiting             | Dr Alexander T Maskin |                                          | University of Nebraska (US)             | 5                              | Deceased | January 2017   |               |
| NCT01844362 | Uterus Transplantation From Live Donor                                                                      | Active, not recruiting         | Dr Mats Brännström    |                                          | Sahlgrenska University Hospital, Sweden | 10 (9)                         | Living   | September 2012 | April 2018    |
| NCT02637674 | Uterine Allotransplantations Using Uterine Grafts From Brain-dead Female Donors (ATU)                       | Active, recruiting             | Dr Tristan Gauthier   | Phase 1                                  | University Hospital, Limoges (FR)       | 10                             | Deceased | January 2016   | January 2022  |
| NCT02741102 | Uterine Transplant in Absolute Uterine Infertility (AUIF)                                                   | Not yet recruiting             | Dr Stefan G Tullius   |                                          | Brigham and Women's Hospital (USA)      | 10 (5 donors and 5 recipients) | living   | June 2016      | January 2023  |
| NCT02987023 | Uterus Transplantation From Live Donors With Robotic Assisted Surgery - Gothenburg II (UTX-robot)           | Active, recruiting             | Dr Mats Brännström    | Observational: cohort (Patient registry) | Sahlgrenska University Hospital, Sweden | 10 (5 donors and 5 recipients) | Living   | November 2016  | December 2022 |
| NCT03048396 | Acceptance of Uterus Transplantation                                                                        | recruiting by invitation only. | Dr Sara Brucker       |                                          | University Women's Hospital Tübingen    | 10                             | Living   | October 2016   | December 2019 |

Table 2: Study inclusion - exclusion criteria and primary-secondary outcomes

| ClinicalTrials.gov Identifier: | Ages Eligible for Study: | Inclusion-exclusion criteria                                                                                                                                                                                                                                                                                                                                                                                                                                                                                                                                                                                                                                                                                                                                                                                                                                                                                                                                                                                                                                                                                                                                      | Primary Outcome Measures:                                                                                                                                                                                                                                 | Secondary Outcome Measures:                                                                                                                                                                                                                                                                    |
|--------------------------------|--------------------------|-------------------------------------------------------------------------------------------------------------------------------------------------------------------------------------------------------------------------------------------------------------------------------------------------------------------------------------------------------------------------------------------------------------------------------------------------------------------------------------------------------------------------------------------------------------------------------------------------------------------------------------------------------------------------------------------------------------------------------------------------------------------------------------------------------------------------------------------------------------------------------------------------------------------------------------------------------------------------------------------------------------------------------------------------------------------------------------------------------------------------------------------------------------------|-----------------------------------------------------------------------------------------------------------------------------------------------------------------------------------------------------------------------------------------------------------|------------------------------------------------------------------------------------------------------------------------------------------------------------------------------------------------------------------------------------------------------------------------------------------------|
| NCT03307356                    | 21-40 years              | Absolute Uterine Factor Infertility<br>Received counseling regarding alternatives to UTx<br>Intact ovaries and normal ovarian reserve<br>Vaginal length >6 cm<br>Body mass index <30 kg/m <sup>2</sup><br>Fluent in the English Language<br>HPV negative or received vaccination for HPV<br>Willing to comply with screening, protocol and all required procedures<br>In stable committed relationship for ≥3 years<br>Has frozen embryos of sufficient embryo quality/quantity<br>No Previous multiple major abdominal/pelvic surgery<br>No Severe endometriosis<br>No History of hypertension, diabetes mellitus, thrombophilia or other clotting or bleeding disorders, significant heart, liver, kidney or central nervous system disease<br>No History of prior malignancy except for cervical cancer in stage 1a or 1b (must be in remission for 3 years)<br>No History of significant psychiatric illness<br>Allergy, hypersensitivity, or intolerance of expected immunosuppressive agents, heparin or aspirin<br>No Seropositivity for HIV, HBV, HCV, HTLV-1<br>No current smoker, Chemical and/or alcohol dependency or abuse<br>No Renal abnormalities | Successful engraftment of deceased donor uterus [ Time Frame: Assessed 12 months after transplant ]<br>Uterus remains in recipient with no complications (i.e. infection or rejection) or any complications that did arise could be successfully treated. | Postoperative complications [ Time Frame: Assessed 12 months after transplant ]<br>Including but not limited to evidence of damage to surrounding organs/vessels, need for reoperation, thromboembolic event, infection, rejection episodes (clinical and histologic), impaired renal function |
| NCT02388802                    | 18 - 36 years            | Inside of age range<br>Successful oocyte retrieval<br>Normal BMI<br>No significant medical or psychiatric co-morbidities<br>No previous oncology patients <5 years in remission                                                                                                                                                                                                                                                                                                                                                                                                                                                                                                                                                                                                                                                                                                                                                                                                                                                                                                                                                                                   | Transplant success with no clinical, immunological or radiological signs of graft rejection within the first 12 months post-operatively.                                                                                                                  | Pregnancy rate [TF: 24 months ]; live birth rate [TF: 36 months ]                                                                                                                                                                                                                              |

|             |                                                             |                                                                                                                                                                                                                                                                                                                                                                                                                                                                                                 |                                                                                                                                                                                                 |                                                                                                                                                                                                                                                                                                                                      |
|-------------|-------------------------------------------------------------|-------------------------------------------------------------------------------------------------------------------------------------------------------------------------------------------------------------------------------------------------------------------------------------------------------------------------------------------------------------------------------------------------------------------------------------------------------------------------------------------------|-------------------------------------------------------------------------------------------------------------------------------------------------------------------------------------------------|--------------------------------------------------------------------------------------------------------------------------------------------------------------------------------------------------------------------------------------------------------------------------------------------------------------------------------------|
| NCT02573415 | 21 -45 years<br>(embryos produced between the age of 21-39) | Hypertension<br>Diabetes<br>Significant heart, liver, kidney or central nervous system disease<br>Medical diagnosis placing the subject at high risk of surgical complications<br>Current smoker<br>History of prior malignancy except for cervical cancer in stage 1a or 1b after 3 years.<br>HIV, mycobacteria, hepatitis B, or C.<br>Present or recent systemic infection<br>Chemical and/or alcohol dependency or abuse<br>Presence of low lying pelvic kidney<br>BMI greater than 30 kg/m2 | Number of successful live births after uterus transplant and IVF<br><br>Full term birth by cesarian section after IVF followed by uterus transplant<br><br>[TF: 2 years after transplantation ] | Pregnancy complications:<br>Hypertension<br>Pre-eclampsia<br>Intrauterine growth restriction<br>Premature rupture of membranes<br>Preterm delivery<br>Intrauterine fetal demise<br>Neonatal complications:<br>birth defects<br>perinatal infections<br>low birth weight<br>neonatal death<br>neonatal intensive care unit admissions |
| NCT02656550 | 20 - 35 Years                                               | Diabetes mellitus Type I and II<br>known hypersensitivity to Tacrolimus, Thymoglobulin or CellCept<br>Existing hypertension<br>Previous oncology patients <5 years in remission<br>Body Mass index >30<br>Active Infection<br>Seropositivity for HIV, HBV, HCV, HTLV-I<br>Any medical diagnosis placing the subject at high risk of surgical complications<br>Non-smoker<br>No Alcohol or drug abuse                                                                                            | Number of successful live births after uterine transplant and IVF.<br>Full term birth by cesarean section.<br>[TF: 2 years after transplant]                                                    |                                                                                                                                                                                                                                                                                                                                      |
| NCT02409147 | 21 - 35 Years                                               | Intact native ovaries<br>No medical contraindication to transplantation<br>No medical contraindication to reproduction and gestation in a transplanted uterus.<br>Congenital or acquired uterine factor infertility (UFI)<br>Counseled about alternate options for family building<br>Previous oncology patients <5 years in remission                                                                                                                                                          | Successful Uterine Transplant<br>Graft implantation and take (without rejection)<br>successful menstruation for a set period.                                                                   |                                                                                                                                                                                                                                                                                                                                      |

|             |                  |                                                                                                                                                                                                                                                                                                                                                                                                                                                                                                                                                                                                                                                                                                                                                                                               |                                                                                                                                                                                                                          |                                                                                                                                                                                                                                                                                                                            |
|-------------|------------------|-----------------------------------------------------------------------------------------------------------------------------------------------------------------------------------------------------------------------------------------------------------------------------------------------------------------------------------------------------------------------------------------------------------------------------------------------------------------------------------------------------------------------------------------------------------------------------------------------------------------------------------------------------------------------------------------------------------------------------------------------------------------------------------------------|--------------------------------------------------------------------------------------------------------------------------------------------------------------------------------------------------------------------------|----------------------------------------------------------------------------------------------------------------------------------------------------------------------------------------------------------------------------------------------------------------------------------------------------------------------------|
|             |                  | <p>Negative evaluation for other relevant congenital abnormalities (such as a pelvic kidney).</p> <p>Neovaginal creation surgery prior to uterine transplant for women with Mullerian agenesis</p> <p>Intact ovaries and adequate ovarian reserve</p> <p>Good psychological evaluation</p> <p>Stable relationship</p> <p>No evidence of coercion;</p> <p>Financial capacity to cover anticipated expenses of assisted reproductive services.</p>                                                                                                                                                                                                                                                                                                                                              | <p>IVF, pregnancy and delivery of the baby via C-section.</p> <p>[TF: 2 years ];</p>                                                                                                                                     |                                                                                                                                                                                                                                                                                                                            |
| NCT01844362 | 18 - 39<br>Years | <p>less than 39 years;</p> <p>good general health</p> <p>Exclusion Criteria:</p> <p>poor ovarian reserve or older than 39 years</p> <p>systemic or psychiatric disease</p>                                                                                                                                                                                                                                                                                                                                                                                                                                                                                                                                                                                                                    | <p>Surviving transplants (12 months) [TF: up to 3 years after transplantation ]</p>                                                                                                                                      | <p>Ppregnancy rate [TF up to 3 years after transplantation ];</p> <p>Live birth rate [TF: up to 4 years after transplantation ]</p>                                                                                                                                                                                        |
| NCT02637674 | 25 - 36<br>Years | <p>Women with AUI</p> <p>couple living together for at least two years</p> <p>BMI <math>\leq</math> 30 kg/m<sup>2</sup></p> <p>At least 12 months from colpoplasty surgery</p> <p>At least 12 months from diagnosis of uterine infertility</p> <p>Nulliparous</p> <p>Compliance with the legal criteria of medically assisted procreation</p> <p>Signed informed consent by the patient and spouse</p> <p>Prior psychological evaluation not contraindicating participation in the study</p> <p>Normal ovarian function and satisfactory ovarian reserve</p> <p>At least 10 embryos obtained by IVF</p> <p>No previous major abdomino-pelvic surgery</p> <p>No previous ileal or sigmoid colpoplasty</p> <p>History of cancer</p> <p>Active tobacco consumption</p> <p>Hypertension (HT),</p> | <p>Successful uterus transplant Success will be measured by by the occurrence of at least two spontaneous menstrual cycles during the first year following the UT.</p> <p>[TF: 12 month after each transplantation ]</p> | <p>UT complications [TF: up to 41 after transplantation]</p> <p>Successful of pregnancies achieved [TF: up to 30 months after transplantation]</p> <p>Pregnancy complications after UT [ TF: up to 39 months after transplantation]</p> <p>Successful of births achieved [TF: up to 39 months after transplantation. ]</p> |

|  |                                                                                                                                                                                                                                                                                                                                                                                                                                                                                                                                                                                                                                                                                                                                                                                                                                                                                                                                                                                                                                                                                                                                                                                                                                                                                                                                                                                                                                                        |  |  |
|--|--------------------------------------------------------------------------------------------------------------------------------------------------------------------------------------------------------------------------------------------------------------------------------------------------------------------------------------------------------------------------------------------------------------------------------------------------------------------------------------------------------------------------------------------------------------------------------------------------------------------------------------------------------------------------------------------------------------------------------------------------------------------------------------------------------------------------------------------------------------------------------------------------------------------------------------------------------------------------------------------------------------------------------------------------------------------------------------------------------------------------------------------------------------------------------------------------------------------------------------------------------------------------------------------------------------------------------------------------------------------------------------------------------------------------------------------------------|--|--|
|  | <p>Type 1 or 2 diabetes<br/> Chronic kidney disease<br/> Evolving cardiovascular pathology<br/> Psychiatric disease<br/> Contraindication to one of the treatments used in the study<br/> Rare blood group AB or B,<br/> Presence of anti-HLA antibodies<br/> Negative Epstein-Barr virus serology<br/> HIV or hepatitis C infection,<br/> Hepatitis B (acute, chronic, treated)<br/> Single kidney<br/> Detected cardiac pathology<br/> Dermatological, stomatological and/or ear, nose, and throat (ENT) pathology/ies contraindicating treatment with ISDs<br/> Thoracic-abdominal-pelvic CT scan anomalies contraindicating UT and the use of treatment with ISDs<br/> Increased risk of miscarriage (thrombophilia, anormal karyotype)<br/> Separation of the couple.</p> <p>Spouse/partner with azoospermia<br/> Less than 10 frozen embryos obtained<br/> Separation of the couple.<br/> Previous uterine transplantation</p> <p>Donors:<br/> Brain dead female <math>\geq 18</math> years old and <math>\leq 50</math> years old.</p> <p>Length of no flow &gt; 10 min<br/> Pregnancy at the time of brain death<br/> Time from delivery &lt; 3 months<br/> Positive oncogen human papillomavirus (HPV )test (16 and 18)<br/> Myomas &gt; 3 cm and/or endoluminal fibroid and/or endometrial polyps and/or heterogenous annexial cyst seen in a pelvic ultrasound or CT scan<br/> Multi-scarred uterus (<math>\geq 2</math> uterine scars)</p> |  |  |
|--|--------------------------------------------------------------------------------------------------------------------------------------------------------------------------------------------------------------------------------------------------------------------------------------------------------------------------------------------------------------------------------------------------------------------------------------------------------------------------------------------------------------------------------------------------------------------------------------------------------------------------------------------------------------------------------------------------------------------------------------------------------------------------------------------------------------------------------------------------------------------------------------------------------------------------------------------------------------------------------------------------------------------------------------------------------------------------------------------------------------------------------------------------------------------------------------------------------------------------------------------------------------------------------------------------------------------------------------------------------------------------------------------------------------------------------------------------------|--|--|

|             |               |                                                                                                                                                                                                                                                                                                                                                                                                                                                                                                                                                                                                                                                                                                                                                                                                                                                                                                                                                                                                                                                                                                                                                                                                                                             |                                                                                                                                                                                                               |                                                                                                                                                                                                                                                                                                                                                                                                                                                                                                                                                                                                                        |
|-------------|---------------|---------------------------------------------------------------------------------------------------------------------------------------------------------------------------------------------------------------------------------------------------------------------------------------------------------------------------------------------------------------------------------------------------------------------------------------------------------------------------------------------------------------------------------------------------------------------------------------------------------------------------------------------------------------------------------------------------------------------------------------------------------------------------------------------------------------------------------------------------------------------------------------------------------------------------------------------------------------------------------------------------------------------------------------------------------------------------------------------------------------------------------------------------------------------------------------------------------------------------------------------|---------------------------------------------------------------------------------------------------------------------------------------------------------------------------------------------------------------|------------------------------------------------------------------------------------------------------------------------------------------------------------------------------------------------------------------------------------------------------------------------------------------------------------------------------------------------------------------------------------------------------------------------------------------------------------------------------------------------------------------------------------------------------------------------------------------------------------------------|
|             |               | <p>Registered in the national registry of persons who refuse to donate any organ.</p> <p>Opposition to the uterine retrieval from the donor's relatives.</p> <p>Uterine agenesis and uterine malformation</p> <p>Criteria usually seen as contraindicating retrieval (HIV+, evolutive neoplasia, etc.)</p>                                                                                                                                                                                                                                                                                                                                                                                                                                                                                                                                                                                                                                                                                                                                                                                                                                                                                                                                  |                                                                                                                                                                                                               |                                                                                                                                                                                                                                                                                                                                                                                                                                                                                                                                                                                                                        |
| NCT02741102 | 18 - 40 years | <p>Recipient:</p> <p>Woman with AUII</p> <p>Able to produce at least 6 normal embryos</p> <p>Reasonable weight with BMI less than 30.</p> <p>Normal kidney function</p> <p>Able to undergo transplant and be compliant with treatment</p> <p>Stable partner and social supports</p> <p>Partner willing to undergo psychological evaluation and receive immunizations as recommended</p> <p>Stable home environment to support a child</p> <p>No smoking, alcohol use or use of illicit drugs</p> <p>No condition that would make pregnancy or taking anti rejection medicines too risky.</p> <p>No active infection: Human Immunodeficiency Virus (HIV) , Tuberculosis, Hepatitis B, Hepatitis C</p> <p>No history of extensive abdominal or pelvic surgery or abnormal Papanicolaou test (PAP smear) or genital warts</p> <p>History of pelvic inflammatory disease</p> <p>Donor.</p> <p>Age over 40 up to age 60</p> <p>Has completed having a family</p> <p>No previous miscarriages</p> <p>Able to take a birth control pill containing estrogen</p> <p>Weight reasonable with BMI (Body Mass Index) of 30 or less</p> <p>Good social supports</p> <p>No smoking, alcohol use or use of illicit drugs</p> <p>No Psychiatric illness</p> | <p>Number of successful live births following uterus transplant/embryo transfer [àTF: 2 years after uterine transplant ]</p> <p>Full term live birth by caesarian section after uterus transplant and IVF</p> | <p>Complications during pregnancy</p> <p>Pre-eclampsia, hypertension, pre-term delivery</p> <p>Complications following uterine donation</p> <p>Excessive bleeding , infection and bladder dysfunction</p> <p>Impact of uterine donation on donor quality of life</p> <p>serial SF 36 QOL survey by psychiatrist at pre-donation and at follow-up appointments</p> <p>Impact of uterine transplant on quality of life [ Time Frame: Up to 5 years after uterine transplant ]</p> <p>Measured by serial SF 36 QOL survey by psychiatrist pre-transplant and at follow-up appointments.." Cost comparison for uterine</p> |

|             |               |                                                                                                                                                                                                                                                                                                                                                                                                                                                                                                                                                                                                                                                                                      |                                                                                                                                                   |                                                                                                                                                                                                                                                                                          |
|-------------|---------------|--------------------------------------------------------------------------------------------------------------------------------------------------------------------------------------------------------------------------------------------------------------------------------------------------------------------------------------------------------------------------------------------------------------------------------------------------------------------------------------------------------------------------------------------------------------------------------------------------------------------------------------------------------------------------------------|---------------------------------------------------------------------------------------------------------------------------------------------------|------------------------------------------------------------------------------------------------------------------------------------------------------------------------------------------------------------------------------------------------------------------------------------------|
|             |               | <p>No cervical or endometrial polyps (growths) or tumors in the uterus muscle</p> <p>No history of more than 1 Caesarean section, abnormal PAP smear or genital warts</p> <p>Internal scarring from extensive abdominal or pelvic surgery</p> <p>Hypertension, Coronary artery disease, Chronic Obstructive Lung disease (emphysema) and Diabetes</p> <p>Active cancer or incompletely treated cancer</p> <p>Active infection including Human Immunodeficiency Disease (HIV) , Tuberculosis, Hepatitis B or Hepatitis C</p> <p>Significant history of either blood clots or bleeding tendencies</p> <p>Evidence of coercion or exchange of money or goods for donating the organ</p> |                                                                                                                                                   | <p>transplant vs. surrogacy vs adoption [ Time Frame: Up to 5 years after uterine transplant ]</p> <p>At the end of the study, investigators will calculate average cost of each modality, i.e. transplant vs surrogacy vs adoption to compare the three alternatives to infertility</p> |
| NCT02987023 | 20 - 38 Years | <p>Woman with AUI</p> <p>BMI&lt;30</p> <p>No systemic disease</p> <p>No psychiatric disease</p>                                                                                                                                                                                                                                                                                                                                                                                                                                                                                                                                                                                      | <p>Live births after uterus transplantation [ TF: 5 years ]</p> <p>Assessed by records from birthing unit and Swedish National Birth registry</p> | <p>Development of children after uterus transplantation [ TF: 8 years ]</p> <p>Assessed by growth parameters and neuropsychiatric tests (Bayley Mental Scale, M-CHAT, CBCL, WPPSI-IV)</p>                                                                                                |
| NCT03048396 | 20 - 40 Years | <p>Woman with AUI</p> <p>BMI&lt;30</p> <p>No systemic disease</p> <p>No psychiatric disease</p>                                                                                                                                                                                                                                                                                                                                                                                                                                                                                                                                                                                      |                                                                                                                                                   |                                                                                                                                                                                                                                                                                          |
